# Supplementary material for: Physiological Conditions Leading to Maternal Subclinical Ketosis in Holstein Dairy Cows Can Impair the Offspring’s Postnatal Growth and Gut Microbiome Development
Source: MDPI journal article supplement (doi:10.3390/microorganisms11071839), 2023-07-19
Supplement: s1 [file s1]

## ***SUPPLEMENTAL MATERIALS***

**Table S1.** Body weight and BCS for NONKET and SK cows from -3 until 0 weeks relative to parturition.

| Parameter        | Group  |       | SEM <sup>1</sup> | P-Value |      |      |           |
|------------------|--------|-------|------------------|---------|------|------|-----------|
|                  | NONKET | SK    |                  | Group   | Week | G×W  | Lactation |
| BW, kg           | 818.7  | 868.3 | 31.9             | 0.29    | 0.30 | 0.68 | > 0.05    |
| BCS <sup>2</sup> | 3.1    | 3.2   | 0.13             | 0.59    | 0.32 | 0.28 | > 0.05    |

<sup>1</sup> Largest SEM.

<sup>2</sup> Body condition score (scale 1 = thin to 5 = obese)

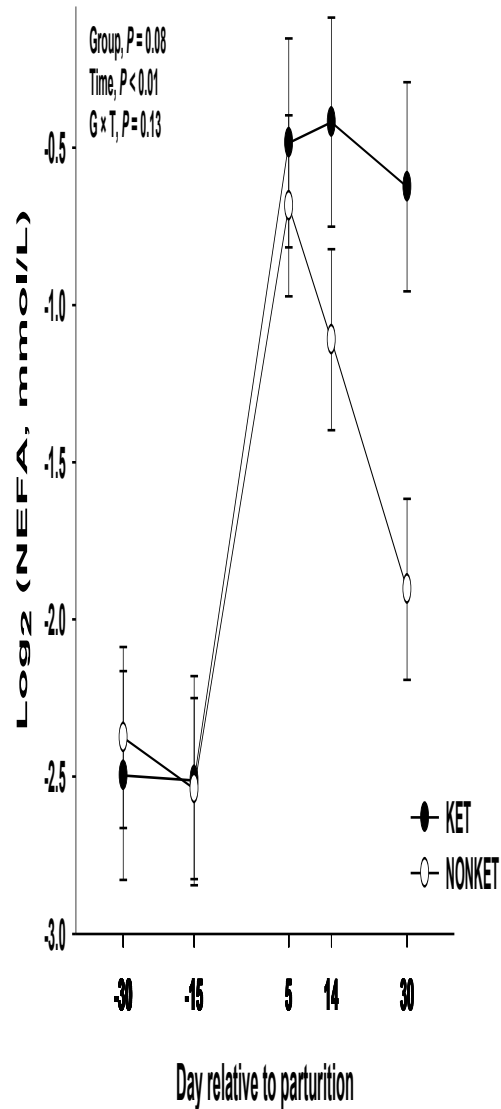

**Figure S1.** Blood albumin (Panel A), urea (Panel B), and ceruloplasmin (Panel C) from calves born to dams classified as subclinical ketotic (SK;  $\geq 1.4$  mmol/L) or nonketotic (NONKET;  $< 1.4$  mmol/L) during the first 10 days postpartum. Data are from samples taken at birth (precolostrum; 0 d), 2 d (postcolostrum), 14, 21 and 42 d of age. The  $P$ -values for the main effect of group (G), time (T), and their interaction ( $G \times T$ ) are shown. Main separation between time points was evaluated when a  $G \times T$  interaction ( $P \leq 0.10$ ) was observed, and differences (\*) were declared at  $P \leq 0.05$ . Values are means, and SE are represented by vertical bars.

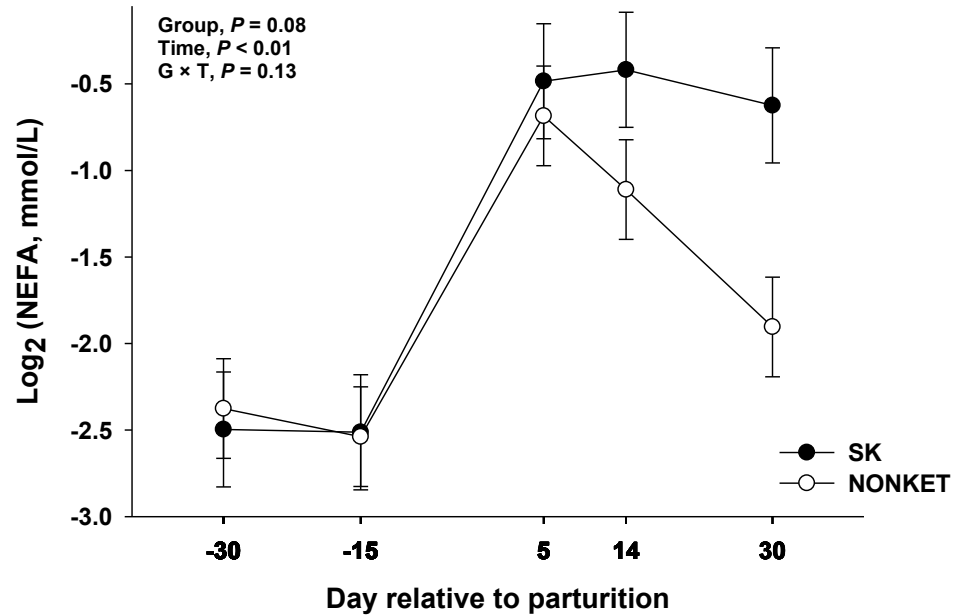

**Figure S2.** Blood non-esterified fatty acids from cows classified as subclinical ketotic (SK;  $\geq 1.4$  mmol/L) or nonketotic (NONKET;  $< 1.4$  mmol/L) during the first 10 days postpartum. Data are from samples taken at various time points during the transition period. The  $P$ -values for the main effect of group (G), time (T), and their interaction ( $G \times T$ ) are shown. Values are means, and SE are represented by vertical bars.

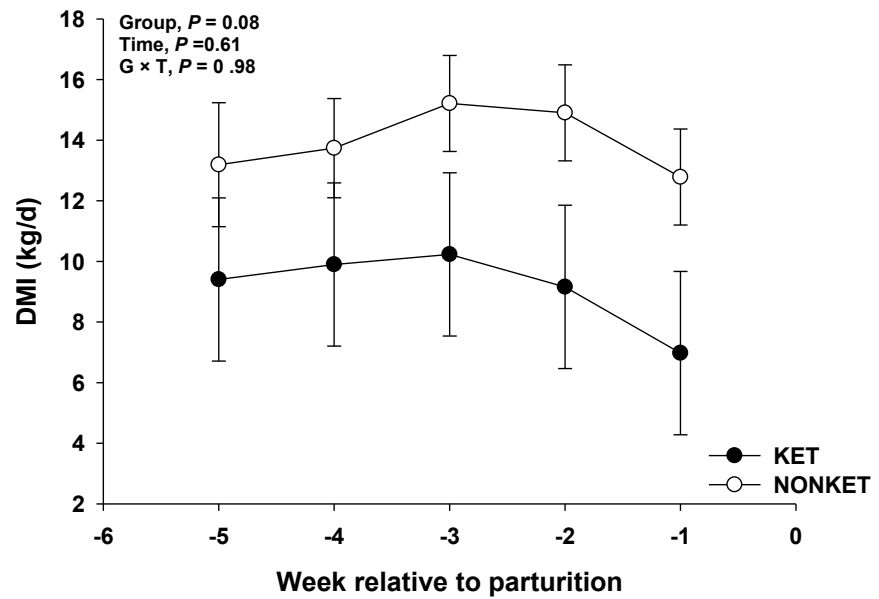

**Figure S3.** Prepartal dry matter intake from cows classified as subclinical ketotic (SK;  $\geq 1.4$  mmol/L) or nonketotic (NONKET;  $< 1.4$  mmol/L) during the first 10 days postpartum. The  $P$ -values for the main effect of group (G), time (T), and their interaction ( $G \times T$ ) are shown. Values are means, and SE are represented by vertical bars.

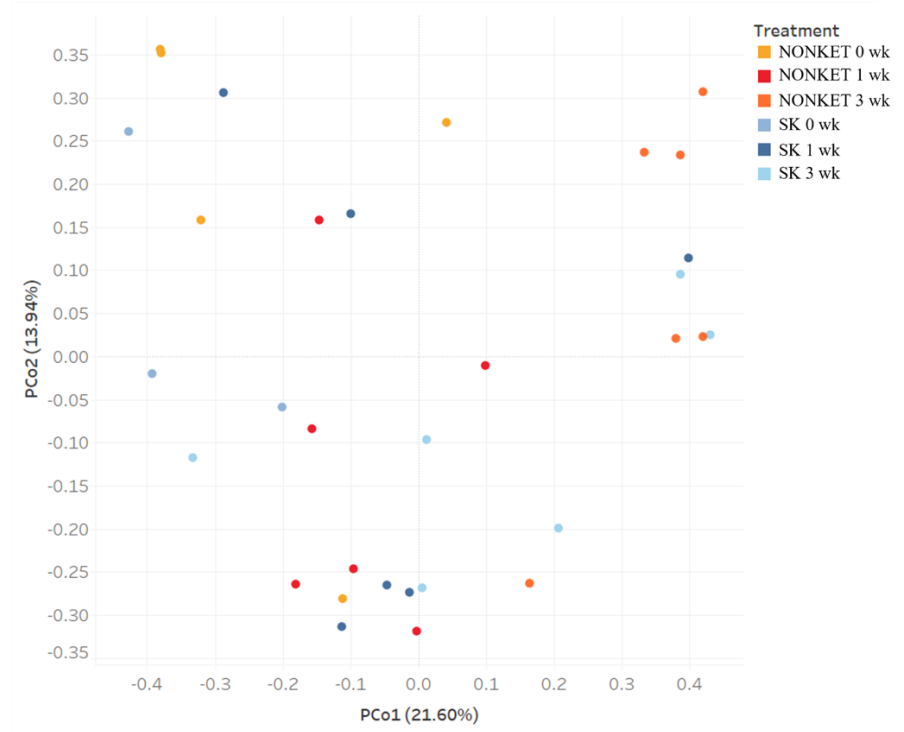

**Figure S4.** Comparison of fecal bacterial communities in calves born to subclinical ketotic (SK) or non-ketotic (NONKET) cows at 0, 1, and 3 wk of age. PCoA was performed using a Bray-Curtis distance matrix. The x and y axes correspond to Principal Components 1 (PCo1) and 2 (PCo2).
